# Supplementary material for: Quantitative EEG in type 1 diabetic adults with childhood exposure to severe hypoglycaemia: a 16 year follow-up study
Source: PubMed Central journal article supplement — Diabetologia. 2011 Jun 3;54(9):2404–8. doi: 10.1007/s00125-011-2208-3 (PMC3149676; doi:10.1007/s00125-011-2208-3), 2011-06-03
Supplement: 125_2011_2208_MOESM1_ESM.pdf [file 125_2011_2208_MOESM1_ESM.pdf]

**Electronic supplementary material Table 1** Characteristics of diabetic participants with and without early<sup>a</sup> exposure to SH and their respective controls, given as mean (SD) unless otherwise noted.

| Characteristic                                          | Diabetes with early SH |            | Diabetes without early SH |            |
|---------------------------------------------------------|------------------------|------------|---------------------------|------------|
|                                                         | Diabetic participants  | Controls   | Diabetic participants     | Controls   |
| No. of participants (women/men)                         | 9 (3/6)                | 9 (3/6)    | 18 (10/8)                 | 18 (10/8)  |
| Age (years)                                             | 28.1 (2.2)             | 28.1 (2.5) | 28.8 (2.0)                | 29.0 (1.9) |
| Age (years) at diabetes onset                           | 5.4 (2.6)              |            | 9.8 (2.9)                 |            |
| Diabetes duration (years)                               | 22.7 (2.8)             |            | 19.1 (1.8)                |            |
| No. of SH episodes, median (range)                      | 7 (3-27)               |            | 3 (0-14)                  |            |
| Lifetime mean HbA <sub>1c</sub> <sup>b</sup> (%)        | 9.3 (1.1)              |            | 8.5 (0.7)                 |            |
| No. of HbA <sub>1c</sub> measurements                   | 72 (12)                |            | 53 (13)                   |            |
| Blood glucose (mmol/l) at EEG recording, median (range) | 11.6 (5.5-23.3)        |            | 10.1 (4.8-21.0)           |            |

a: By 10 years of age

b: Average HbA<sub>1c</sub> since diabetes onset, weighted for frequency of recordings
